# Supplementary material for: Crohn disease-like enterocolitis remission after empagliflozin treatment in a child with glycogen storage disease type Ib: a case report
Source: PubMed Central journal article supplement (PMC8254289; doi:10.1186/s13052-021-01100-w), 2021-07-02
Supplement: 13052_2021_1100_MOESM2_ESM.pdf [file 13052_2021_1100_MOESM2_ESM.pdf]

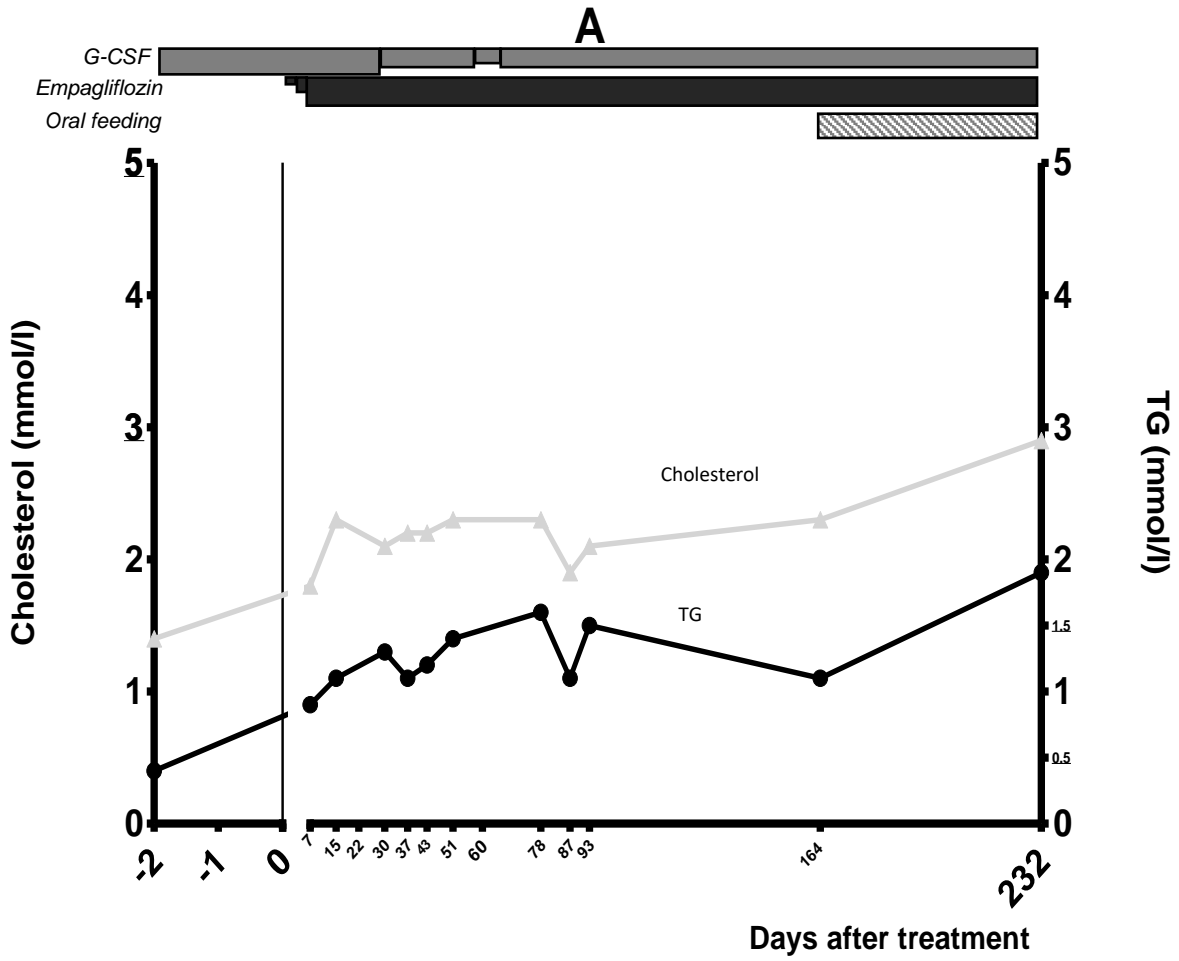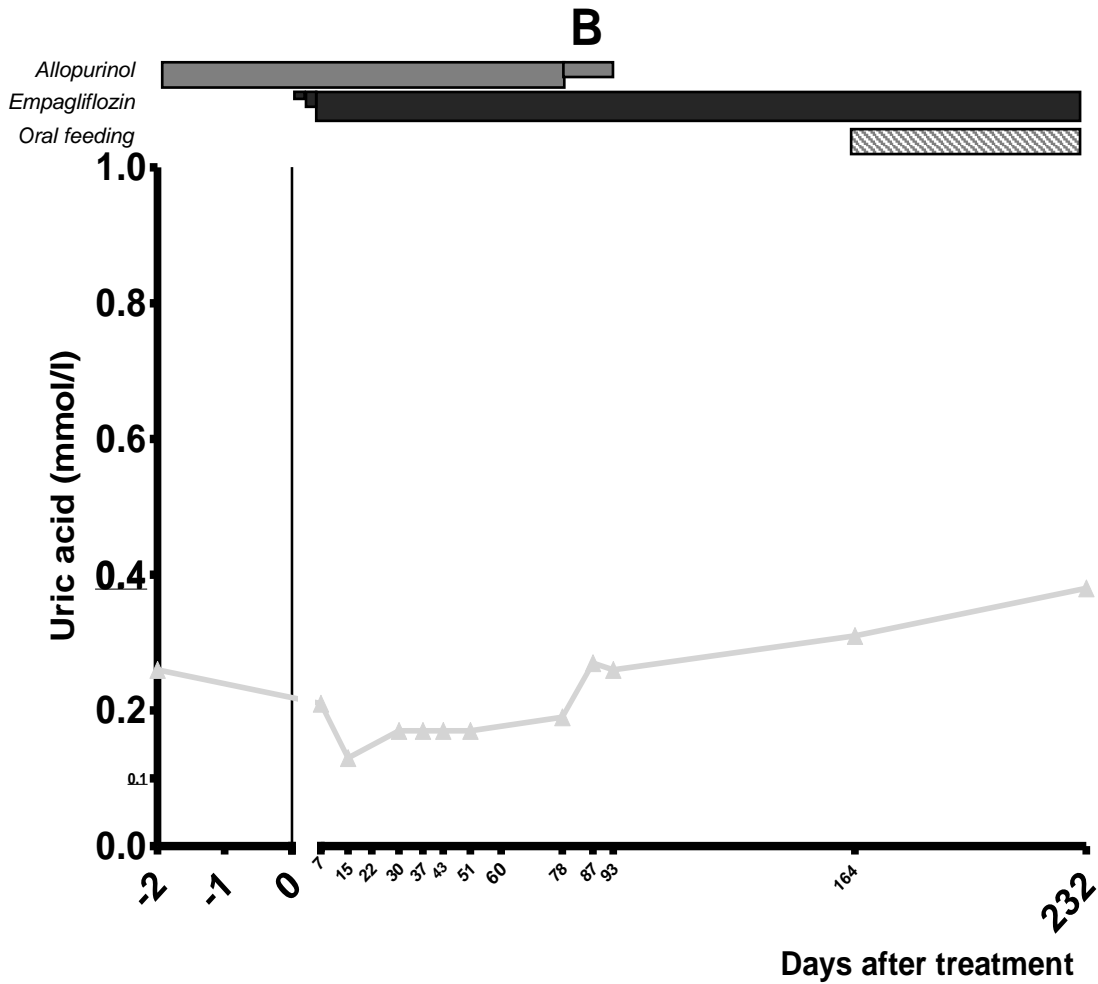

**Additional file 2**
