# Supplementary material for: Crohn disease-like enterocolitis remission after empagliflozin treatment in a child with glycogen storage disease type Ib: a case report
Source: PubMed Central journal article supplement (PMC8254289; doi:10.1186/s13052-021-01100-w), 2021-07-02
Supplement: 13052_2021_1100_MOESM3_ESM.pdf [file 13052_2021_1100_MOESM3_ESM.pdf]

| Time frame   | Study day    | Days analysed | Time points analysed |        |        |        |          |        |                          | TIME BELOW RANGE (TBR) |                  | TIME IN RANGE (TIR) |                   | TIME ABOVE RANGE (TAR) |            |
|--------------|--------------|---------------|----------------------|--------|--------|--------|----------|--------|--------------------------|------------------------|------------------|---------------------|-------------------|------------------------|------------|
|              |              |               |                      | median | min    | max    | variance | SD     | Coefficient of Variation | <3.0 mmol/L            | ≥ 3 < 3.9 mmol/L | ≥ 3.9 ≤ 7.8 mmol/L  | ≥ 3.9 ≤ 10 mmol/L | > 7.8 mmol/L           | >10 mmol/L |
|              |              |               |                      | mmol/L | mmol/L | mmol/L | mmol/L   | mmol/L | %                        | %                      | %                | %                   | %                 |                        |            |
| <i>24-h</i>  | -1 to +10    | 12            | 1151                 | 4.44   | 2.61   | 7.33   | 14.52    | 0.90   | 1.11                     | 3,2                    | 25,5             | 71,2                | 71,2              | 0,0                    | 0,0        |
|              | +85 to +96   | 12            | 794                  | 5.17   | 2.67   | 8.67   | 25.74    | 1.20   | 1.30                     | 2,4                    | 16,4             | 80,5                | 81,2              | 0,8                    | 0,0        |
|              | +164 to +176 | 13            | 1178                 | 5.55   | 2.94   | 8.50   | 18.07    | 1.00   | 1.00                     | 0,1                    | 5,8              | 93,3                | 94,1              | 0,8                    | 0,0        |
|              | +214 to +226 | 13            | 1175                 | 5.44   | 2.89   | 9.78   | 18.54    | 1.02   | 1.00                     | 0,6                    | 5,9              | 92,2                | 93,5              | 1,4                    | 0,0        |
|              | +245 to +257 | 13            | 1174                 | 5.94   | 2.94   | 10.33  | 23.07    | 1.13   | 1.10                     | 0,1                    | 3,5              | 91,7                | 96,3              | 4,7                    | 0,2        |
| <i>Night</i> | -1 to +10    | 12            | 195                  | 4.78   | 2.94   | 6.94   | 16.87    | 0.97   | 1.11                     | 1,0                    | 17,9             | 81,0                | 81,0              | 0,0                    | 0,0        |
|              | +85 to +96   | 12            | 195                  | 5.61   | 2.94   | 7.89   | 29.78    | 1.29   | 1.32                     | 1,5                    | 13,3             | 83,6                | 85,1              | 1,5                    | 0,0        |
|              | +165 to +176 | 12            | 193                  | 5.44   | 3.17   | 7.44   | 14.69    | 0.90   | 0.93                     | 0,0                    | 6,7              | 93,3                | 93,3              | 0,0                    | 0,0        |
|              | +215 to +226 | 12            | 192                  | 5.44   | 3.17   | 7.28   | 12.84    | 0.84   | 0.87                     | 0,0                    | 6,3              | 93,8                | 93,8              | 0,0                    | 0,0        |
|              | +246 to +257 | 12            | 194                  | 6.06   | 3.00   | 8.33   | 17.87    | 1.00   | 0.92                     | 0,0                    | 3,6              | 93,8                | 96,4              | 2,6                    | 0,0        |

**Additional file 3.**
